# Supplementary material for: Bran-Enriched Milled Durum Wheat Fractions Obtained Using Innovative Micronization and Air-Classification Pilot Plants
Source: MDPI journal article supplement (doi:10.3390/foods10081796), 2021-08-03
Supplement: s1 [file s1]

Supplementary Materials:

**Table S1.** Mean yield percentage (%± S.D.) of micronized samples and air-classified fractions (cv. Saragolla, Maestà and Iride). Same letter: no significant difference (p>0.05) within all fractions (F and G types) for each cultivar (n=2).

| Air classified fractions |                       |                        |                         |                       |                        |                         |                          |                           |                          |                            |                          |                        |                        |                       |
|--------------------------|-----------------------|------------------------|-------------------------|-----------------------|------------------------|-------------------------|--------------------------|---------------------------|--------------------------|----------------------------|--------------------------|------------------------|------------------------|-----------------------|
| Cultivar                 | F220                  | F230                   | F240                    | F250                  | F260                   | F270                    | F280                     | G220                      | G230                     | G240                       | G250                     | G260                   | G270                   | G280                  |
| Saragolla                | 20.8±0.3 <sup>m</sup> | 32.2±2.8 <sup>i</sup>  | 44.6±1.3 <sup>h</sup>   | 71.5±0.5 <sup>e</sup> | 83.1±0.1 <sup>c</sup>  | 90.9±0.5 <sup>bc</sup>  | 93.6±0.1 <sup>ab</sup>   | 79.0±0.4 <sup>cde</sup>   | 67.7±2.8 <sup>ef</sup>   | 55.3±1.5 <sup>g</sup>      | 27.9±0.4 <sup>ilm</sup>  | 16.5±0.3 <sup>mn</sup> | 9.1±0.6 <sup>no</sup>  | 5.8±0.1 <sup>o</sup>  |
| Maestà                   | 27.5±5.9 <sup>m</sup> | 35.2±4.8 <sup>im</sup> | 45.5±0.8 <sup>him</sup> | 75.4±5.4 <sup>e</sup> | 89.8±1.1 <sup>ce</sup> | 92.2±0.3 <sup>bce</sup> | 94.4±0.6 <sup>abce</sup> | 72.1±6.0 <sup>abcde</sup> | 64.5±4.5 <sup>defh</sup> | 54.1±0.6 <sup>defghi</sup> | 24.4±5.2 <sup>hilm</sup> | 9.3±0.4 <sup>lmn</sup> | 7.5±0.4 <sup>lmn</sup> | 5.3±0.8 <sup>mn</sup> |
| Iride                    | 21.1±0.6 <sup>m</sup> | 33.8±0.4 <sup>i</sup>  | 53.9±0.6 <sup>h</sup>   | 75.2±1.3 <sup>e</sup> | 84.4±2.5 <sup>c</sup>  | 90.5±0.6 <sup>bc</sup>  | 92.0±0.3 <sup>abc</sup>  | 78.5±0.6 <sup>cde</sup>   | 65.5±0.4 <sup>f</sup>    | 46.1±0.6 <sup>g</sup>      | 24.8±1.3 <sup>lm</sup>   | 15.5±2.5 <sup>mn</sup> | 9.4±0.4 <sup>n</sup>   | 8.0±0.3 <sup>n</sup>  |

**Table S2.** Mean ash content (% dry basis ± S.D.) of micronized samples and air-classified fractions (cv. Saragolla, Maestà and Iride). Same letter: no significant difference (p>0.05) within all fractions (F and G types) for each cultivar (n=2).

| Air classified fractions |                |                        |                         |                          |                          |                           |                            |                            |                            |                            |                           |                            |                            |                            |                         |
|--------------------------|----------------|------------------------|-------------------------|--------------------------|--------------------------|---------------------------|----------------------------|----------------------------|----------------------------|----------------------------|---------------------------|----------------------------|----------------------------|----------------------------|-------------------------|
| Cultivar                 | Micronize<br>d | F220                   | F230                    | F240                     | F250                     | F260                      | F270                       | F280                       | G220                       | G230                       | G240                      | G250                       | G260                       | G270                       | G280                    |
| Saragolla                |                |                        |                         |                          |                          |                           |                            |                            |                            |                            |                           |                            |                            |                            |                         |
| a                        | 1.97±0.00      | 3.10±0.06 <sup>a</sup> | 2.68±0.19 <sup>ab</sup> | 2.38±0.00 <sup>bc</sup>  | 2.19±0.10 <sup>bcd</sup> | 2.12±0.17 <sup>bcde</sup> | 2.24±0.10 <sup>bcdef</sup> | 1.97±0.01 <sup>cdefg</sup> | 1.72±0.08 <sup>defg</sup>  | 1.60±0.09 <sup>defg</sup>  | 1.57±0.01 <sup>deg</sup>  | 1.50±0.11 <sup>eg</sup>    | 1.39±0.08 <sup>g</sup>     | 1.56±0.00 <sup>deg</sup>   | 1.32±0.05 <sup>g</sup>  |
| Maestà                   | 2.15±0.04      | 3.38±0.25 <sup>a</sup> | 3.09±0.06 <sup>ab</sup> | 2.79±0.00 <sup>abc</sup> | 2.42±0.00 <sup>cd</sup>  | 2.19±0.13 <sup>cde</sup>  | 2.24±0.10 <sup>cdef</sup>  | 2.24±0.05 <sup>cdefg</sup> | 1.77±0.11 <sup>defgh</sup> | 1.72±0.08 <sup>efgh</sup>  | 1.67±0.00 <sup>efgh</sup> | 1.64±0.02 <sup>efgh</sup>  | 1.58±0.08 <sup>efgh</sup>  | 1.56±0.07 <sup>eh</sup>    | 1.55±0.00 <sup>eh</sup> |
| Iride                    | 1.97±0.00      | 2.99±0.07 <sup>a</sup> | 2.47±0.10 <sup>b</sup>  | 2.15±0.02 <sup>bc</sup>  | 1.98±0.05 <sup>cd</sup>  | 1.99±0.00 <sup>cde</sup>  | 1.88±0.05 <sup>cdef</sup>  | 1.91±0.01 <sup>cdefg</sup> | 1.51±0.10 <sup>fgh</sup>   | 1.55±0.16 <sup>defgh</sup> | 1.32±0.04 <sup>h</sup>    | 1.64±0.05 <sup>defgh</sup> | 1.65±0.01 <sup>defgh</sup> | 1.53±0.01 <sup>d fgh</sup> | 1.38±0.02 <sup>h</sup>  |

**Table S3.** Mean particle size content (% ± Standard Deviation) of micronized samples and air-classified fractions (cv. Saragolla, Maestà and Iride). Same letter: no significant difference (p>0.05) within all fractions (F and G types) for each cultivar (n=2).

| Air classified fraction Micronized samples and air-classified fractions (particle size: ø > 425 µm) |            |                         |                         |                          |                         |                                       |                                        |                                       |                                        |                                        |                           |                           |                           |                                       |                                      |
|-----------------------------------------------------------------------------------------------------|------------|-------------------------|-------------------------|--------------------------|-------------------------|---------------------------------------|----------------------------------------|---------------------------------------|----------------------------------------|----------------------------------------|---------------------------|---------------------------|---------------------------|---------------------------------------|--------------------------------------|
| Cultivar                                                                                            | Micronized | F220                    | F230                    | F240                     | F250                    | F260                                  | F270                                   | F280                                  | G220                                   | G230                                   | G240                      | G250                      | G260                      | G270                                  | G280                                 |
| Saragolla                                                                                           | 9.73±0.06  | 38.29±3.44 <sup>b</sup> | 6.22±0.57 <sup>c</sup>  | 6.32±1.23 <sup>ac</sup>  | 5.10±0.14 <sup>ac</sup> | 6.09±0.33 <sup>ac</sup>               | 10.25±3.47 <sup>ab</sup> <sub>c</sub>  | 8.96±2.56 <sup>abc</sup>              | 12.45±1.96 <sup>a</sup> <sub>bc</sub>  | 12.22±2.17 <sup>a</sup> <sub>bc</sub>  | 13.98±0.42 <sub>abc</sub> | 23.85±0.91 <sub>ab</sub>  | 32.20±3.01 <sub>ab</sub>  | 50.28±3.09 <sub>ab</sub>              | 51.25±2.9 <sup>s</sup> <sub>ab</sub> |
| Maestà                                                                                              | 10.68±0.11 | 11.78±0.46 <sup>b</sup> | 7.85±0.97 <sup>bc</sup> | 5.24±0.10 <sup>bcd</sup> | 3.95±0.77 <sup>ed</sup> | 6.95±0.78 <sup>bc</sup> <sub>de</sub> | 6.09±0.88 <sup>bcd</sup> <sub>de</sub> | 7.66±0.61 <sup>abc</sup> <sub>d</sub> | 12.96±0.65 <sup>a</sup> <sub>bcd</sub> | 12.39±1.63 <sup>a</sup> <sub>bcd</sub> | 15.31±1.12 <sub>abc</sub> | 27.71±2.26 <sub>abc</sub> | 45.22±0.62 <sub>abc</sub> | 50.85±2.07 <sup>ab</sup> <sub>c</sub> | 56.61±1.39 <sub>abc</sub>            |
| Iride                                                                                               | 11.38±0.40 | 9.50±0.17 <sup>b</sup>  | 5.66±0.12 <sup>b</sup>  | 4.91±0.42 <sub>b</sub>   | 3.98±0.67 <sub>b</sub>  | 6.32±0.18 <sup>b</sup>                | 7.03±0.45 <sup>b</sup>                 | 7.49±0.67 <sup>bc</sup>               | 8.87±2.28 <sup>abc</sup>               | 11.89±1.30 <sup>a</sup> <sub>bc</sub>  | 13.14±0.71 <sub>abc</sub> | 32.46±2.77 <sub>abc</sub> | 40.08±1.54 <sub>abc</sub> | 48.68±1.11 <sub>ab</sub>              | 52.31±2.15 <sub>ab</sub>             |

| Micronized samples and air-classified fractions (particle size: 425 µm > ø > 180µm) |            |                         |                          |                          |                           |                             |                                         |                                           |                                            |                                            |                                         |                                        |                                          |                                            |                                           |
|-------------------------------------------------------------------------------------|------------|-------------------------|--------------------------|--------------------------|---------------------------|-----------------------------|-----------------------------------------|-------------------------------------------|--------------------------------------------|--------------------------------------------|-----------------------------------------|----------------------------------------|------------------------------------------|--------------------------------------------|-------------------------------------------|
| Cultivar                                                                            | Micronized | F220                    | F230                     | F240                     | F250                      | F260                        | F270                                    | F280                                      | G220                                       | G230                                       | G240                                    | G250                                   | G260                                     | G270                                       | G280                                      |
| Saragolla                                                                           | 43.66±1.84 | 46.29±0.69 <sup>i</sup> | 61.39±2.96 <sup>c</sup>  | 46.97±1.20 <sup>hl</sup> | 47.25±0.22 <sup>ghl</sup> | 50.22±1.15 <sup>ceghl</sup> | 46.91±2.69 <sup>e</sup> <sub>ghil</sub> | 53.30±1.34 <sup>c</sup> <sub>deghil</sub> | 48.12±1.51 <sup>cdefg</sup> <sub>hil</sub> | 55.43±0.55 <sup>cdefgh</sup> <sub>il</sub> | 63.09±0.32 <sup>bcd</sup> <sub>de</sub> | 72.95±0.24 <sup>a</sup>                | 65.23±0.57 <sup>a</sup> <sub>bcd</sub>   | 49.43±3.00 <sup>bcd</sup> <sub>eghil</sub> | 48.52±2.84 <sup>cd</sup> <sub>eghil</sub> |
| Maestà                                                                              | 49.95±1.13 | 68.37±2.22 <sup>b</sup> | 54.28±2.16 <sup>bf</sup> | 41.07±2.01 <sub>n</sub>  | 48.55±0.41 <sup>fmn</sup> | 52.26±0.46 <sup>im</sup>    | 52.36±0.58 <sup>f</sup> <sub>him</sub>  | 53.21±0.97 <sup>f</sup> <sub>ghim</sub>   | 51.50±1.31 <sup>fghil</sup> <sub>m</sub>   | 56.51±0.29 <sup>bdfghi</sup> <sub>lm</sub> | 64.51±1.98 <sup>bcd</sup> <sub>ef</sub> | 70.33±1.51 <sup>a</sup>                | 54.28±0.54 <sup>bcd</sup> <sub>eg</sub>  | 48.82±1.92 <sup>defg</sup> <sub>him</sub>  | 43.19±1.32 <sup>lm</sup> <sub>n</sub>     |
| Iride                                                                               | 44.92±0.53 | 69.86±1.32 <sup>b</sup> | 49.86±1.80 <sup>i</sup>  | 38.13±0.24 <sub>n</sub>  | 41.56±0.65 <sup>imn</sup> | 50.59±0.13 <sup>hi</sup>    | 52.73±2.77 <sup>f</sup> <sub>hi</sub>   | 51.93±1.85 <sup>f</sup> <sub>ghi</sub>    | 46.66±2.12 <sup>fghil</sup> <sub>m</sub>   | 55.98±1.40 <sup>befghi</sup> <sub>l</sub>  | 71.14±1.06 <sup>abc</sup> <sub>ef</sub> | 66.17±2.67 <sup>al</sup> <sub>fg</sub> | 59.37±1.48 <sup>abcd</sup> <sub>hi</sub> | 50.90±1.09 <sup>defg</sup> <sub>hil</sub>  | 47.41±2.26 <sup>efg</sup> <sub>him</sub>  |

| Micronized samples and air-classified fractions (particle size: 180µm > ø) |            |                         |                         |                          |                           |                                        |                                         |                                          |                                           |                                          |                                          |                        |                        |                        |                        |
|----------------------------------------------------------------------------|------------|-------------------------|-------------------------|--------------------------|---------------------------|----------------------------------------|-----------------------------------------|------------------------------------------|-------------------------------------------|------------------------------------------|------------------------------------------|------------------------|------------------------|------------------------|------------------------|
| Cultivar                                                                   | Micronized | F220                    | F230                    | F240                     | F250                      | F260                                   | F270                                    | F280                                     | G220                                      | G230                                     | G240                                     | G250                   | G260                   | G270                   | G280                   |
| Saragolla                                                                  | 46.60±1.78 | 15.81±2.75 <sup>h</sup> | 32.40±3.52 <sup>s</sup> | 46.71±2.43 <sup>bg</sup> | 47.65±0.37 <sup>abg</sup> | 43.69±0.82 <sup>ab</sup> <sub>cg</sub> | 42.84±0.78 <sup>abcd</sup> <sub>g</sub> | 37.74±3.90 <sup>abc</sup> <sub>d</sub>   | 39.43±3.47 <sup>abc</sup> <sub>def</sub>  | 32.35±2.73 <sup>abc</sup> <sub>def</sub> | 22.93±0.74 <sup>bc</sup> <sub>defg</sub> | 3.20±0.67 <sup>i</sup> | 2.57±2.44 <sup>i</sup> | 0.29±0.09 <sup>i</sup> | 0.23±0.14 <sup>i</sup> |
| Maestà                                                                     | 39.01±0.80 | 19.85±1.76 <sup>g</sup> | 37.87±3.13 <sup>f</sup> | 53.69±2.11 <sup>af</sup> | 47.50±1.17 <sup>abf</sup> | 41.49±1.24 <sup>ab</sup> <sub>df</sub> | 41.55±1.46 <sup>abcd</sup> <sub>f</sub> | 39.13±0.36 <sup>abc</sup> <sub>def</sub> | 35.53±1.96 <sup>bc</sup> <sub>def</sub>   | 31.10±1.34 <sup>c</sup> <sub>defg</sub>  | 20.18±3.10 <sup>g</sup>                  | 1.96±0.75 <sup>h</sup> | 0.50±0.08 <sup>h</sup> | 0.34±0.16 <sup>h</sup> | 0.20±0.07 <sup>h</sup> |
| Iride                                                                      | 43.16±0.79 | 20.64±1.15 <sup>e</sup> | 44.48±1.92 <sup>c</sup> | 56.96±0.17 <sup>ac</sup> | 54.46±0.02 <sup>abc</sup> | 43.09±0.31 <sup>ab</sup> <sub>cf</sub> | 40.24±3.21 <sup>bc</sup> <sub>efg</sub> | 40.58±2.52 <sup>bc</sup> <sub>ef</sub>   | 44.47±4.40 <sup>abc</sup> <sub>defg</sub> | 32.13±2.70 <sup>cd</sup> <sub>efg</sub>  | 15.72±0.36 <sup>e</sup>                  | 1.38±0.10 <sup>h</sup> | 0.55±0.05 <sup>h</sup> | 0.41±0.02 <sup>h</sup> | 0.28±0.11 <sup>h</sup> |
